# Supplementary material
Source: PubMed Central journal article supplement (PMC2843397)
Supplement: NIHMS177072-supplement-01.pdf [file NIHMS177072-supplement-01.pdf]

Neuron D-09-00916 revision 2 (version 3.0)

Dicer1 and miR-219 Are Required for Normal Oligodendrocyte Differentiation and Myelination, J. C. Dugas et al.

## INVENTORY OF SUPPLEMENTAL INFORMATION

### Supplemental Data: non-printable items

Movie M1 and M2. Movies showing shivering phenotype of mutant (M2) vs. littermate control (M1) mice, related to Figure 1.

### Supplemental Data: figures

**Figure S1.** Quantification of behavioral phenotypes illustrated in M1 and M2, related to Figure 1.

**Figure S2.** Additional visualization and quantification of in vivo developmental myelination phenotypes in mutant / wt mice, related to Figure 1.

**Figure S3.** Additional visualization and quantification of in vivo developmental OL differentiation phenotypes in mutant / wt mice, related to Figure 2.

**Figure S4.** Quantification of Dicer1 expression in mutant vs. wt OLs in vivo and in vitro, and in OPCs vs. OLs in vitro, related to Figure 3.

**Figure S5.** Additional *in situ* images associated with Figure 4.

**Figure S6.** Additional staining images (CNP and MOG expression) and quantification of data associated with Figure 5.

**Figure S7.** Additional analysis of miRNAs identified in Figure 4 and analyzed in Figure 5 and 6 (analysis of genes targeted by selected miRNAs), and verification of expression of *FoxJ3* and *ZFP238* expression in OPCs / OLs, related to Figure 6.

**Figure S8.** Additional data associated miR-219 repression of target genes, and investigation of the biological role of miR-219 targeted genes *FoxJ3* and *ZFP238*, related to Figure 7.

### Supplemental Data: tables

**Table S1.** Table showing top identified candidate miRNAs induced during OL differentiation, related to Figure 4.

**Table S2-S4.** Tables showing potential targets of miR-219 ranked by context score (S1), level of repression during OL differentiation (S2), or expression level in OPCs (S3), related to Figure 6 and Figure S7.

### Supplemental Experimental Procedures

Neuron D-09-00916 revision 2

Dicer1 and miR-219 Are Required for Normal Oligodendrocyte Differentiation and Myelination, J. C. Dugas et al.

### **SUPPLEMENTAL MATERIAL**

**Movies M1 and M2. Mice lacking functional Dicer1 expression in OPCs and OLs exhibit a shivering phenotype.** A P16 mouse lacking Dicer1 function in its OPCs and OLs, *Olig2<sup>Cre/+</sup>;Dicer1<sup>ff</sup>* (M2), exhibits a shivering phenotype, reminiscent of previously reported CNS myelination defects. A littermate control *Olig2<sup>Cre/+</sup>;Dicer1<sup>f/+</sup>* mouse (M1) does not show this phenotype.

Figure S1

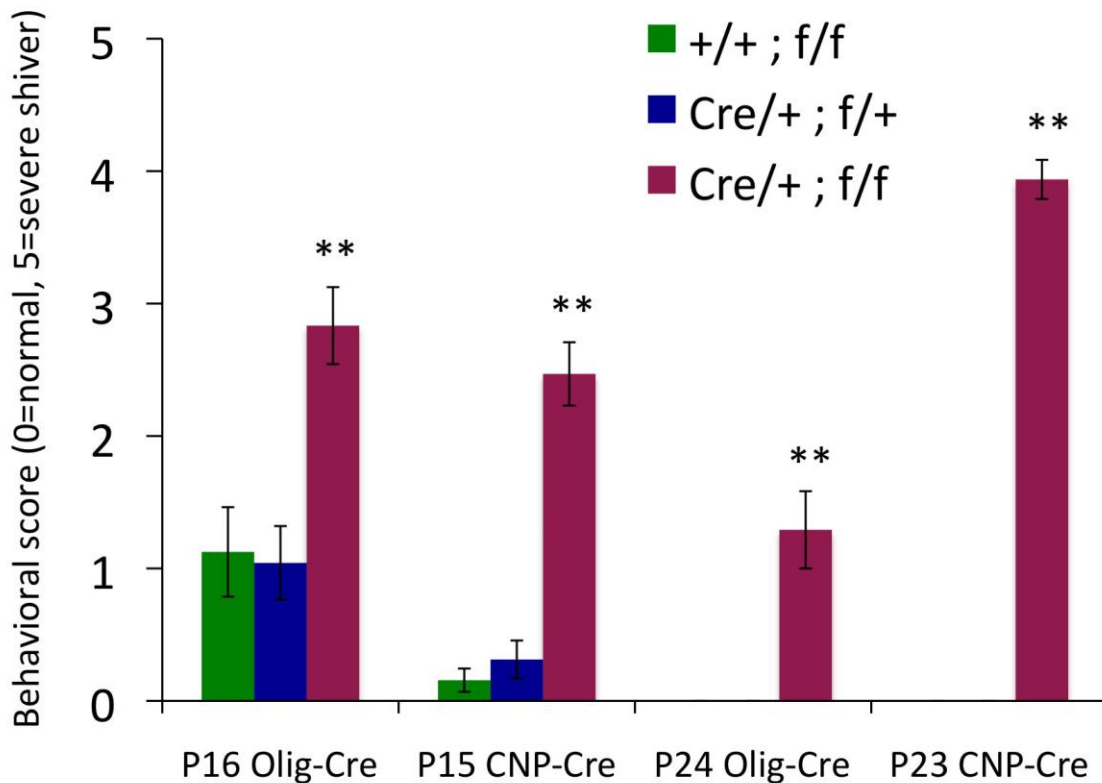

**Figure S1. Mice lacking functional Dicer1 in OPCs and OLs exhibit a shivering phenotype, related to Figure 1.** Quantification of the severity of the “shivering” phenotype in P15-16 and P23-24 mutant *Olig2<sup>Cre/+</sup>;Dicer1<sup>f/f</sup>* and *CNP<sup>Cre/+</sup>;Dicer1<sup>f/f</sup>* mice (red bars) compared to control littermate *Olig2<sup>+/+</sup>;Dicer1<sup>f/f</sup>* and *CNP<sup>+/+</sup>;Dicer1<sup>f/f</sup>* mice (green bars) and *Olig2<sup>Cre/+</sup>;Dicer1<sup>f/+</sup>* and *CNP<sup>Cre/+</sup>;Dicer1<sup>f/+</sup>* mice (blue bars). Scores were generated by four different blinded observers on an arbitrary 0-5 (normal – severe defect) scale. Error bars  $\pm$ S.E.M., n=3-4 mice / genotype. \*\* p < 0.001, post-hoc all pairwise SNK tests, mutant compared to either control condition.

Figure S2

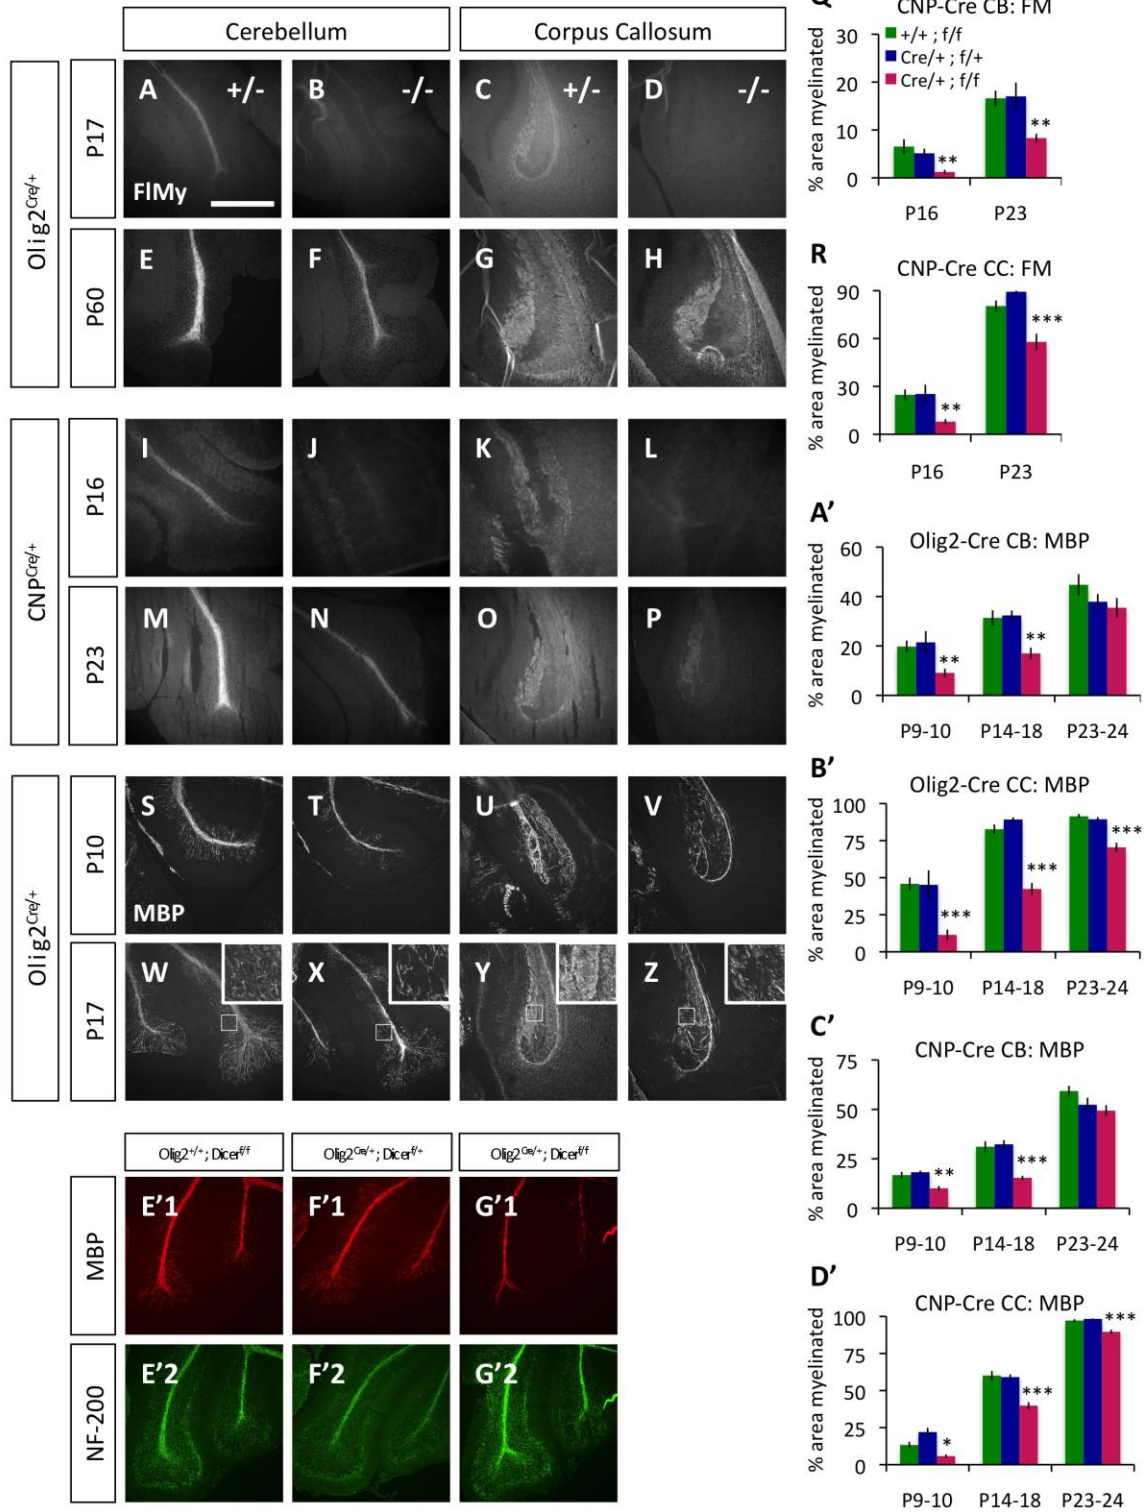

**Figure S2. Disruption of *Dicer1* in *Olig2<sup>Cre/+</sup>;Dicer1<sup>ff</sup>* and *CNP<sup>Cre/+</sup>;Dicer1<sup>ff</sup>* mice specifically delays compact myelin formation in the CNS, related to Fig. 1. A-H.** Images of FIMy staining in the cerebellar arms (A,B,E,F) and splenium regions of the corpus callosum (C,D,G,H) from similar depth sagittal brain sections of P17 (A-D) and P60 (E-H) mutant *Olig2<sup>Cre/+</sup>;Dicer1<sup>ff</sup>* (B,F,D,H) and littermate control *Olig2<sup>Cre/+</sup>;Dicer1<sup>ff/+</sup>* (A,E,C,G) mice. **I-P.** Images of FIMy staining in the cerebellar arms (I,J,M,N) and splenium regions of the corpus callosum (K,L,O,P) from similar depth sagittal brain sections of P16 (I-L) and P23 (M-P) mutant *CNP<sup>Cre/+</sup>;Dicer1<sup>ff</sup>* (J,N,L,P) and littermate control *CNP<sup>Cre/+</sup>;Dicer1<sup>ff/+</sup>* (I,M,K,O) mice. **Q-R.** Quantification of the percentage area myelinated, as determined by FIMy staining, in the cerebellar arms (Q) and corpora callosa (R) of mutant *CNP<sup>Cre/+</sup>;Dicer1<sup>ff</sup>* and littermate control mice at P14-16 and P22-23. **S-Z.** Images of MBP expression in the cerebellar arms (S,T,W,X) and splenium regions of the corpus callosum (U,V,Y,Z) from similar depth sagittal brain sections of P10 (S-V) and P17 (W-Z) mutant *Olig2<sup>Cre/+</sup>;Dicer1<sup>ff</sup>* (T,X,V,Z) and littermate control *Olig2<sup>Cre/+</sup>;Dicer1<sup>ff/+</sup>* (S,W,U,Y) mice. Boxed regions in W-Z are shown at higher magnification in the upper right corner of each panel. **A'-D'.** Quantification of the percentage area myelinated, as determined by MBP staining, in the cerebellar arms (A',C') and corpora callosa (B',D') of control *Olig2<sup>+/+</sup>;Dicer1<sup>ff</sup>*, control *Olig2<sup>Cre/+</sup>;Dicer1<sup>ff/+</sup>*, and mutant *Olig2<sup>Cre/+</sup>;Dicer1<sup>ff</sup>* mice (A'-B') or control *CNP<sup>+/+</sup>;Dicer1<sup>ff</sup>*, control *CNP<sup>Cre/+</sup>;Dicer1<sup>ff/+</sup>*, and mutant *CNP<sup>Cre/+</sup>;Dicer1<sup>ff</sup>* mice (C'-D') at P9-10, P14-18, and P23-24. **E'-G'** Immunostaining of sagittal sections of the cerebellar arms of mutant P10 *Olig2<sup>Cre/+</sup>;Dicer1<sup>ff</sup>* mice (E') and control genotype littermates (F'-G') for myelin (MBP: E'1-G'1) and axons (NF-200: E'2-G'2). Scale bar = 500 $\mu$ m all images. All graphs error bars  $\pm$ S.E.M., n=3-5 animals / condition. \* p < 0.05, \*\* p < 0.01, \*\*\* p < 0.001 post-hoc all pairwise SNK tests, mutant compared to either control condition.

Figure S3

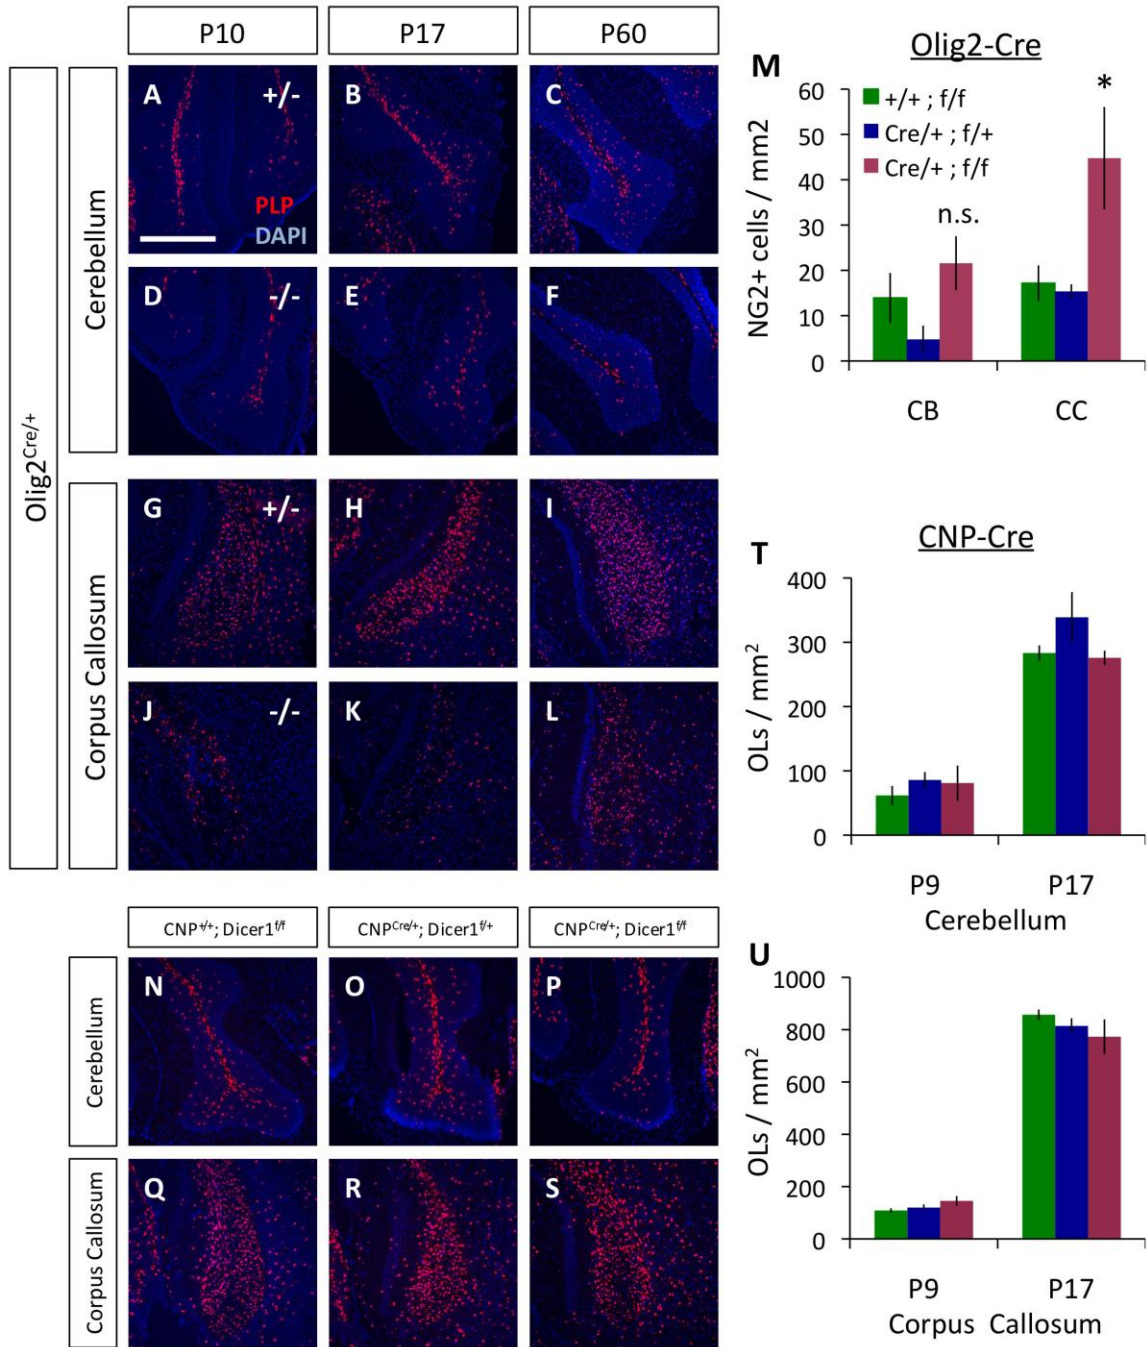

**Figure S3. Mature OL numbers are reduced in mice lacking Dicer1 function in OPCs and OLs, but not in mice lacking Dicer1 function only in OLs, related to Fig. 2.** **A-L.** *In situ* for PLP expression (red) to visualize mature OLs in the cerebellar arms (A-F) and splenium regions of the corpus callosum (G-L) from similar depth sagittal brain sections of P10 (A,D,G,J), P17 (B,E,H,K), and P60 (C,F,I,L) littermate control *Olig2<sup>Cre/+</sup>;Dicer1<sup>f/+</sup>* (A-C, G-I) and mutant *Olig2<sup>Cre/+</sup>;Dicer1<sup>f/f</sup>* (D-F, J-L) mice. **M.** Quantification of immature OPCs (NG2<sup>+</sup> cells) / mm<sup>2</sup> in the cerebellar arms and corpora callosa of mutant *Olig2<sup>Cre/+</sup>;Dicer1<sup>f/f</sup>* and littermate control mice at P24. Error bars  $\pm$ S.E.M., n=3-4 animals / condition. \* p < 0.05, n.s. = not significant post-hoc Holm-Sidak test, mutant compared to either control condition. No significant changes in NG2<sup>+</sup> cell numbers were observed in P10 or P17 mutants relative to littermate controls. **N-S.** *In situ* for PLP expression to visualize mature OLs in the cerebellar arms (N-P) and splenium regions of the corpus callosum (Q-S) from similar depth sagittal brain sections of a P17 littermate control *CNP<sup>+/+</sup>;Dicer1<sup>f/f</sup>* (N,Q) and *CNP<sup>Cre/+</sup>;Dicer1<sup>f/+</sup>* (O,R) mouse and a mutant *CNP<sup>Cre/+</sup>;Dicer1<sup>f/f</sup>* (P,S) mouse. **T-U.** Quantification of mature OLs / mm<sup>2</sup> in the cerebellar arms (T) and corpora callosa (U) of mutant *CNP<sup>Cre/+</sup>;Dicer1<sup>f/f</sup>* and littermate control mice at P9 and P17. No significant differences were detected between mutant and control genotypes. All images scale bar = 500 $\mu$ m.

Figure S4

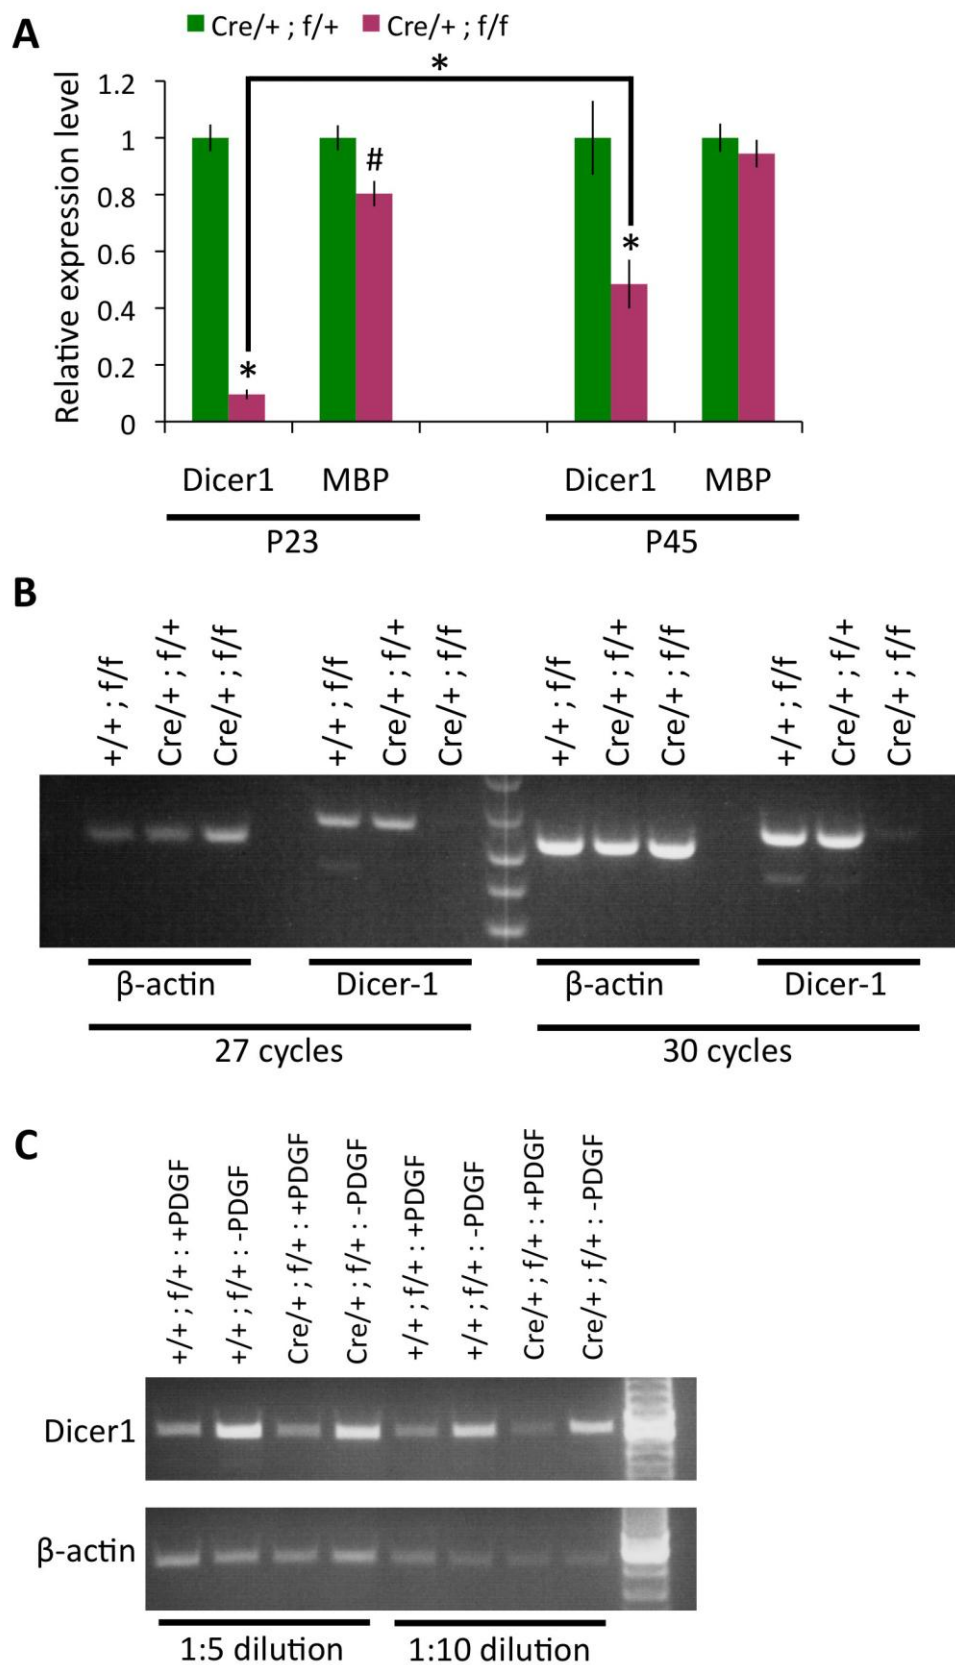



**Figure S4. *Dicer1* expression in mutant and control genotype OLs *in vivo* and *in vitro*, related to Fig. 3.** **A.** qRT-PCR to detect *Dicer1* and MBP expression in *Olig2<sup>Cre/+</sup>;Dicer1<sup>f/+</sup>* (Cre/+;f/+) and *Olig2<sup>Cre/+</sup>;Dicer1<sup>f/f</sup>* (Cre/+;f/f) OL samples acutely purified from P23 or P45 littermates. Error bars  $\pm$ S.E.M.; two (P45) or four (P23) biological replicate OL samples were obtained for each genotype, with 3x independent qRT-PCR runs performed per replicate. \*  $p < 0.001$  post-hoc all pairwise SNK tests, mutant compared to paired control or P23 vs. P45 mutant OL *Dicer1* levels. #  $p < 0.01$  T-test mutant vs. control P23 MBP expression ( $p > 0.05$  in all pairwise SNK tests). **B.** Semi-quantitative RT-PCR of *CNP<sup>+/+</sup>;Dicer1<sup>f/f</sup>* (+/+;f/f), *CNP<sup>Cre/+</sup>;Dicer1<sup>f/+</sup>* (Cre/+;f/+), and *CNP<sup>Cre/+</sup>;Dicer1<sup>f/f</sup>* (Cre/+;f/f) OPCs cultured for 4 DIV in -PDGF-T3 media. RT reactions were performed with 400ng RNA from each sample, and RT reaction products were diluted 1:3 before use in PCR reactions for *Dicer1* or 1:30 for  $\beta$ -actin (27 and 30 cycles each). **C.** Semi-quantitative RT-PCR of *CNP<sup>+/+</sup>;Dicer1<sup>f/+</sup>* (+/+;f/+) and *CNP<sup>Cre/+</sup>;Dicer1<sup>f/+</sup>* (Cre/+;f/+) OPCs cultured for 3 DIV in +PDGF-T3 (+PDGF) or -PDGF-T3 (-PDGF) media. RT reactions were performed with 400ng RNA from each sample, and RT reaction products were diluted 1:5 or 1:10 before use in PCR reactions for *Dicer1* (32 cycles) or  $\beta$ -actin (24 cycles).

Figure S5

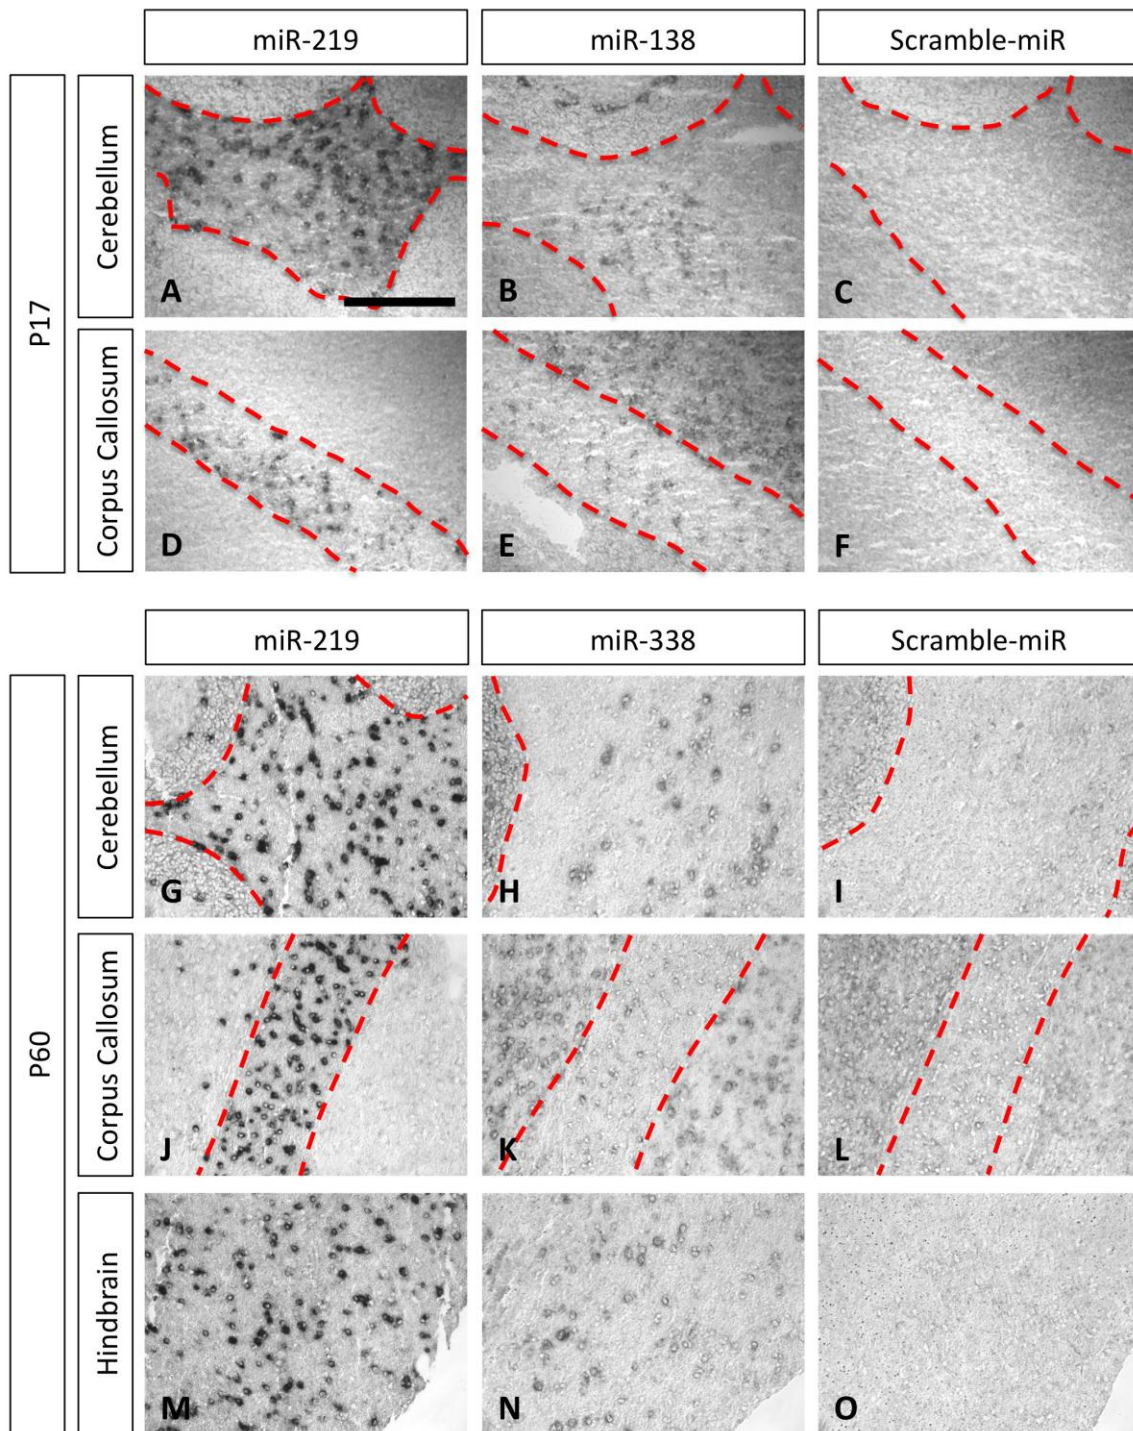

**Figure S5. miR-219, miR-138, and miR-338 are expressed in CNS white matter, related to Fig. 4.** *In situ* hybridizations to visualize miR-219 (A, D, G, J, M), miR-138 (B, E), or miR-338 (H, K, N) expression in P17 (A-F) or P60 (G-O) central cerebellar region (A-C, G-I), corpus callosum (D-F, J-L), or hindbrain (M-O) relative to Scramble-miR negative control (C, F, I, L, O). Scale bar = 200  $\mu$ m.

Figure S6

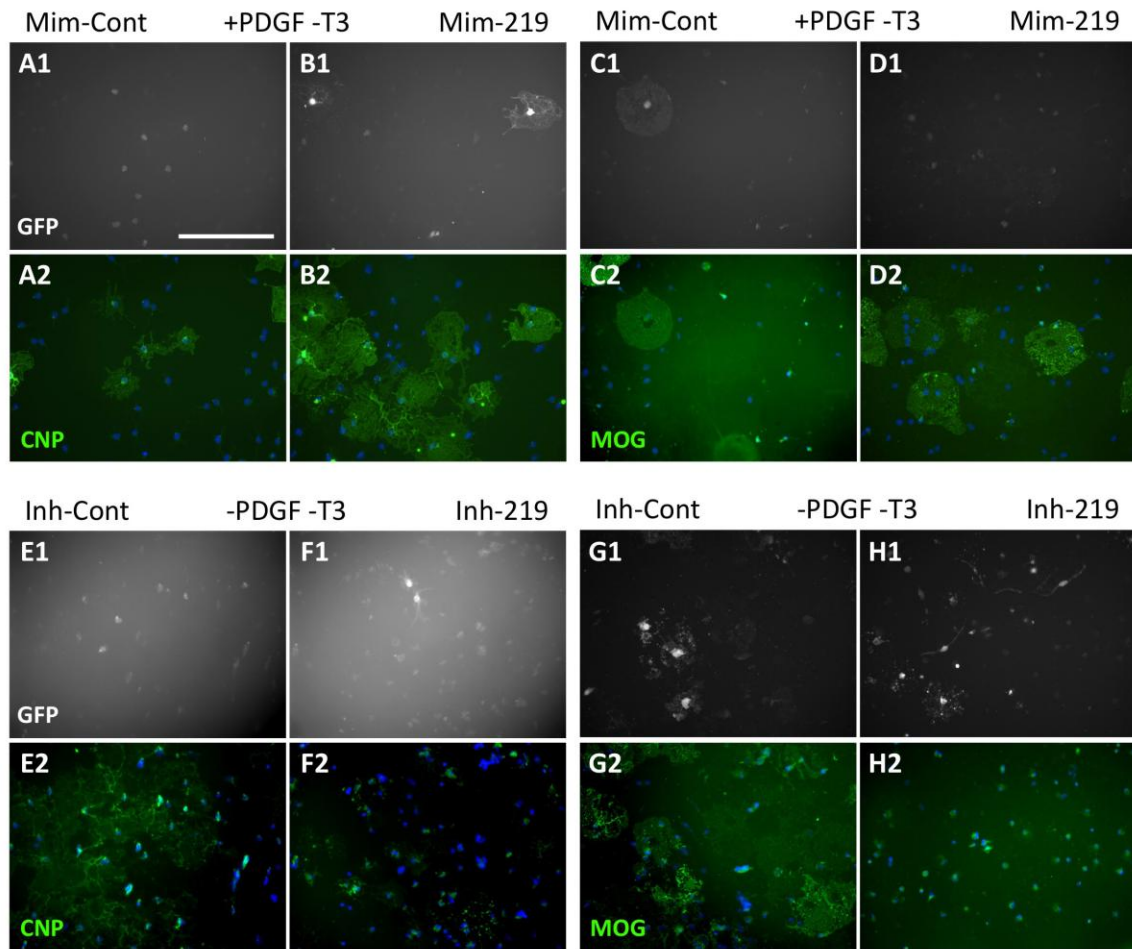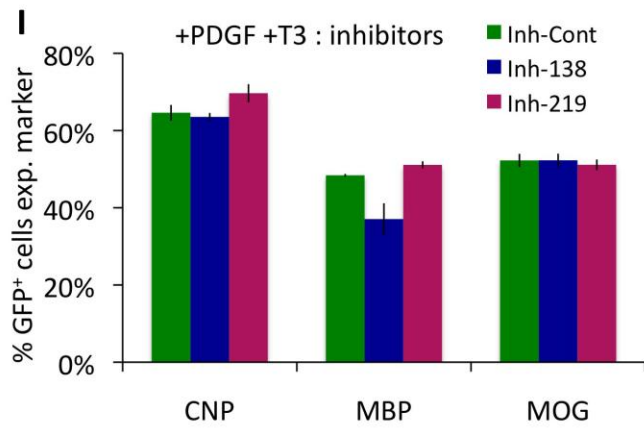

**Figure S6. miR-219 regulates normal mitogen-withdrawal induced, but not T3 induced, OL differentiation, related to Fig. 5. A-H.** Transfected OPCs, identified by GFP expression (white, A1-H1), stained for myelin gene expression (green, CNP: A2-B2, E2-F2; MOG: C2-D2, G2-H2); nuclei marked by DAPI staining (blue, A2-H2). Scale bar = 200  $\mu$ m. **A-D.** OPCs transfected with control mimic (A,C) or miR-219 mimic (B,D) cultured for 7 DIV in +PDGF-T3 media. **E-H.** OPCs transfected with control inhibitor (E,G) or miR-219 inhibitor (F,H) cultured for 3-4 DIV in -PDGF-T3 media. **I.** Percentages of transfected, GFP<sup>+</sup> cells expressing the indicated markers (CNP, MBP, or MOG). OPCs were transfected with control, miR-138, and miR-219 inhibitors and cultured for 7 DIV in +PDGF+T3 media. Error bars  $\pm$ S.E.M., n=6. No significant differences detected post-hoc Holm-Sidak test vs. control.

Figure S7

**A**

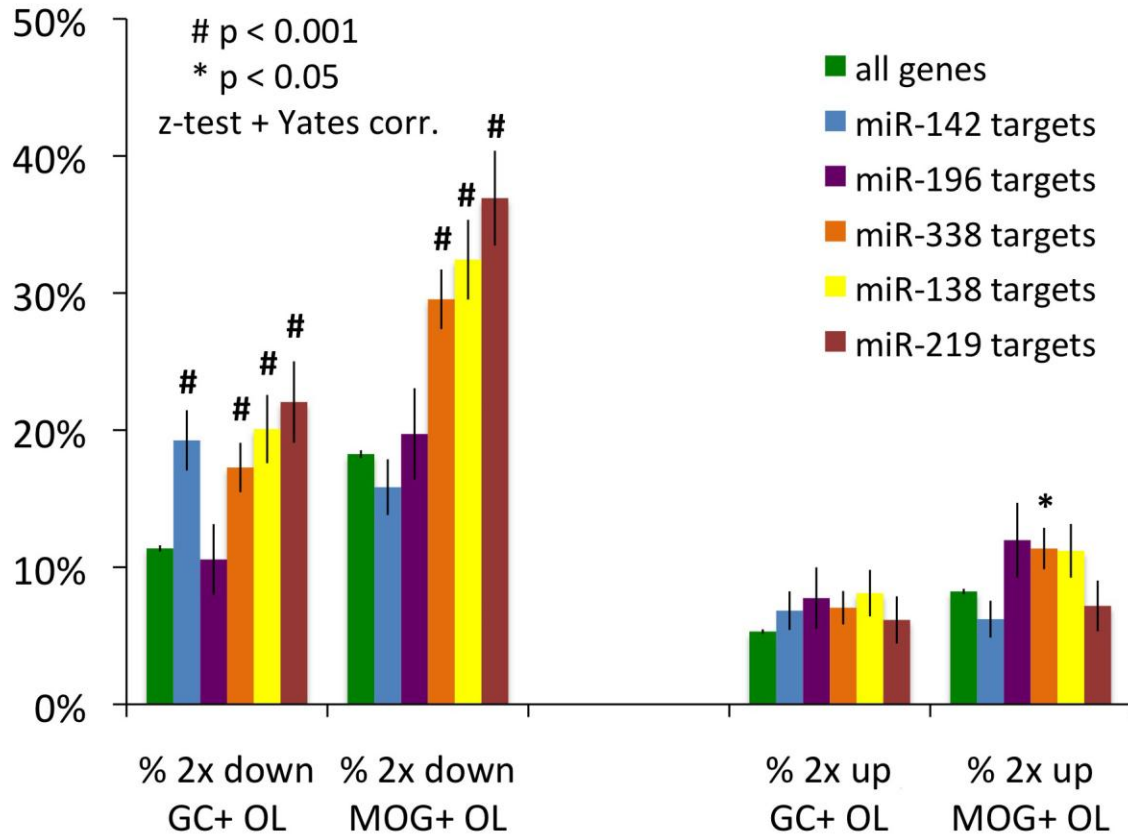

**B**

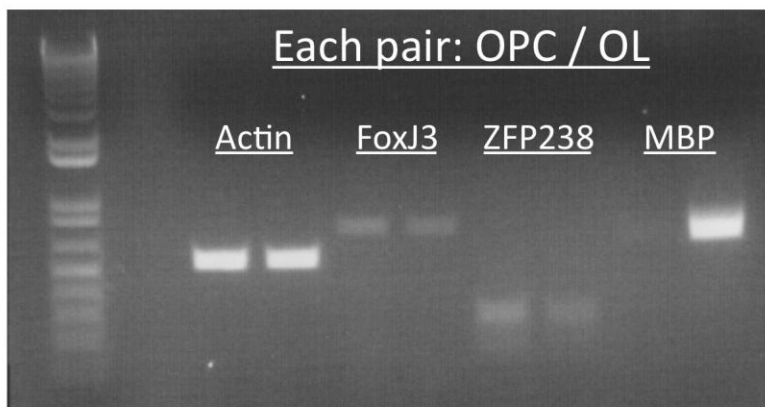

**Figure S7. miR-219, miR-138, and miR-338 preferentially target genes repressed during OL differentiation, related to Fig. 6. A.** Lists of common predicted mammalian target genes for miR-219, miR-138, miR-338, and also miR-142 and miR-196 (enriched in hematopoietic cells and kidney, respectively (Landgraf et al., 2007)), were obtained from TargetScan 5.1 (<http://www.targetscan.org/>). To reduce the likelihood of including “false” targets, we only included predicted targets that were present on at least two mammalian lists (human, mouse, or rat). The percentages of these genes that are induced or repressed during OL differentiation were determined by comparing these lists to the sets of all OL-lineage expressed genes that are increased > 2-fold in immature MOG<sup>-</sup> GC<sup>+</sup> OLs relative to OPCs (2x up GC<sup>+</sup> OL) or mature MOG<sup>+</sup> OLs relative to OPCs (2x up MOG<sup>+</sup> OL), or decreased > 2-fold in immature MOG<sup>-</sup> GC<sup>+</sup> OLs or mature MOG<sup>+</sup> OLs relative to OPCs (2x down GC<sup>+</sup> / MOG<sup>+</sup> OL) (Cahoy et al., 2008). For instance, for miR-219, % 2x down MOG<sup>+</sup> OL = 72 miR-219 predicted targets that are repressed  $\geq$  2-fold in MOG<sup>+</sup> OLs relative to OPCs / 195 total miR-219 predicted targets. “all genes” = the total percentage of unique OL-lineage expressed genes that are induced or repressed during OL differentiation. For instance, % 2x down MOG<sup>+</sup> OL = 3500 unique OL-lineage expressed genes that are repressed  $\geq$  2-fold in MOG<sup>+</sup> OLs relative to OPCs / 19177 total unique, characterized genes. “OL-lineage expressed” is defined as an expression level  $\geq$  250 in the OPC, GC<sup>+</sup> OL, or MOG<sup>+</sup> OL sample. Error bars  $\pm$  standard error of the proportion. \*  $p < 0.05$ , #  $p < 0.001$  z-test with Yates correction, comparing percentage repressed/induced predicted miRNA targeted genes vs. total percentage repressed/induced genes (“all genes”). **B.** Semi-quantitative RT-PCR confirms expression of *FoxJ3* and *ZFP238* in OPCs and approximately 2-fold reduction of expression in OLs. Purified OPCs were cultured for 4 DIV in +PDGF-T3 media (OPC) or -PDGF-T3 media (OL). RT reactions were performed with 400ng RNA from each sample, and RT reaction products were diluted 1:20 before use in PCR reactions for Actin (27 cycles), and 1:2 for *FoxJ3* (24 cycles), *ZFP238* (30 cycles) or *MBP* (27 cycles) reactions.

Figure S8

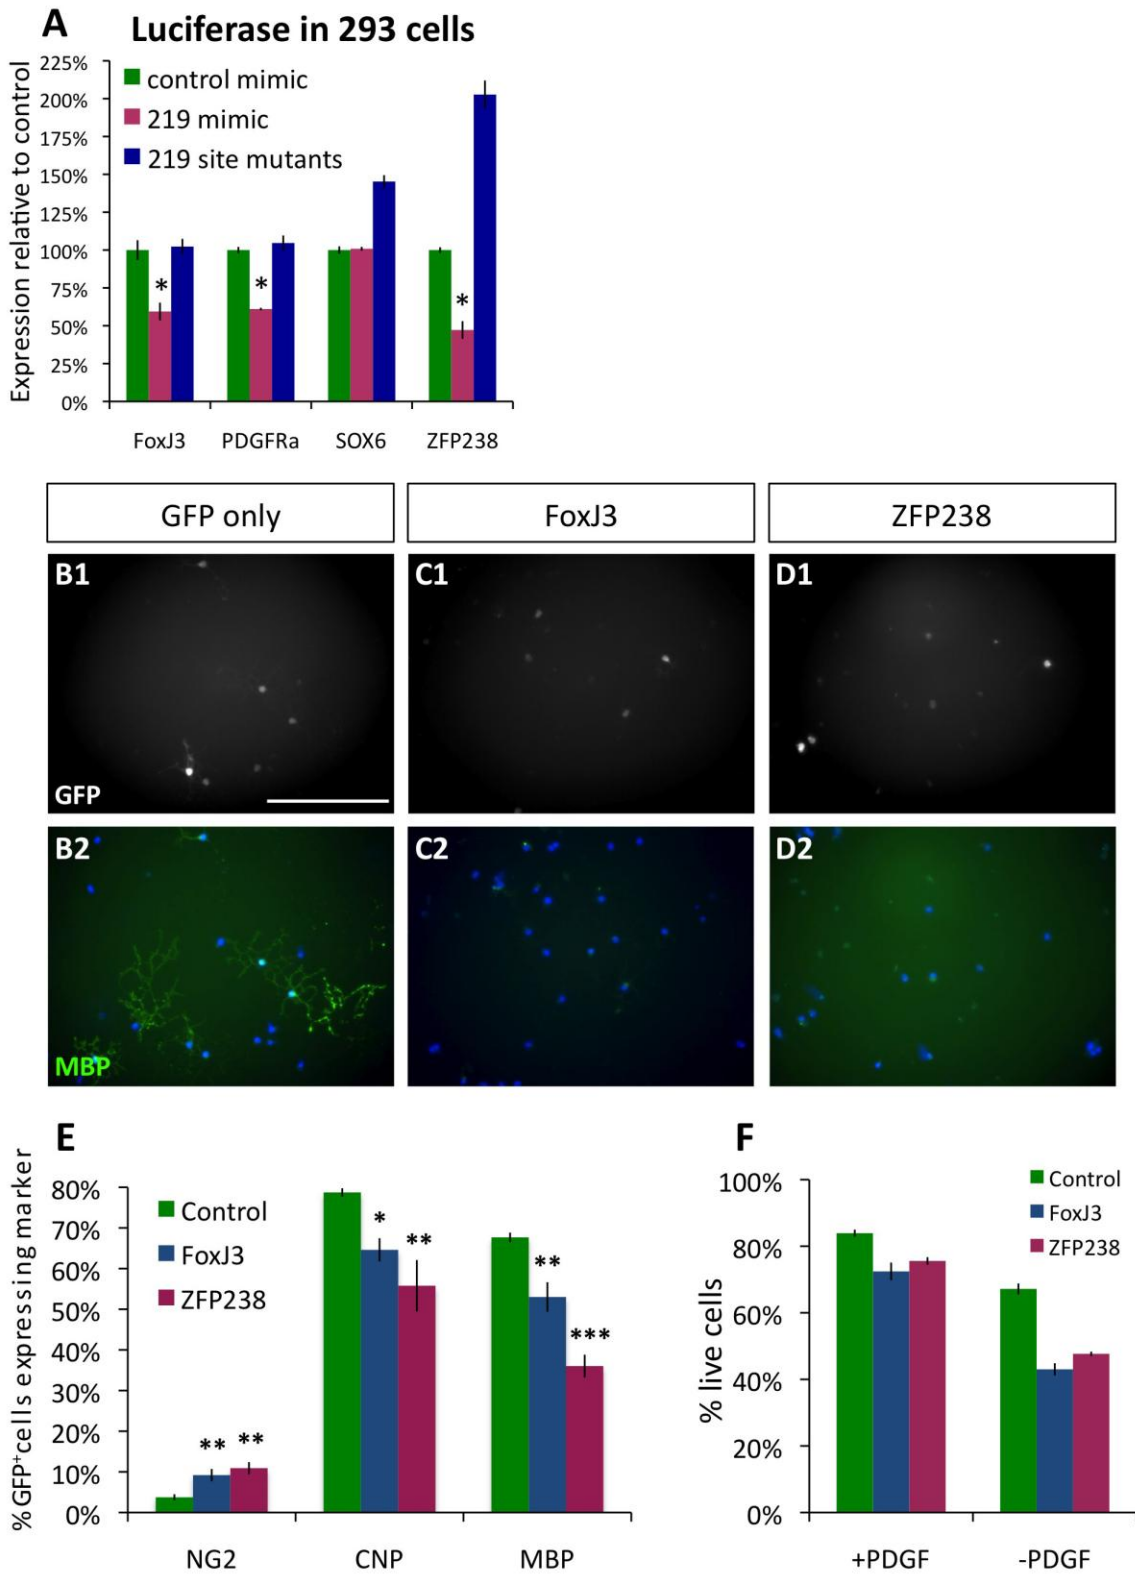



**Figure S8. miR-219 represses the expression of *PDGFR $\alpha$* , *Sox6*, *FoxJ3*, and *ZFP238*; *FoxJ3* and *ZFP238* repress OL differentiation, related to Fig. 7. A.** Levels of normalized luciferase activity detected at 1 DIV in 293 co-transfected with indicated luciferase reporter constructs and either control (green bars) or miR-219 (red bars) mimic, blue bars represent co-transfections of miR-219 mimic with reporter constructs containing mutated 219 binding sites; data displayed relative to control mimic co-transfection luciferase activity levels. Error bars  $\pm$ S.E.M., n = 8-12. \* p < 0.001 T-test control vs. miR-219 mimic transfections (T-tests 219 mutants vs. control not done). **B-D.** OPCs transfected with only the GFP-expression plasmid (B), *FoxJ3* expression plasmid (C), or *ZFP238* expression plasmid (D) are identified by GFP expression (white, B1-D1) and stained for MBP expression (green, B2-D2). Nuclei marked by DAPI staining (blue, B2-D2). Transfected cells cultured 3 DIV in -PDGF-T3 media. Scale bar = 200  $\mu$ m. **E.** Percentages of healthy transfected, GFP<sup>+</sup> cells expressing the indicated markers (OPCs: NG2; OLS: CNP or MBP). Error bars  $\pm$ S.E.M., n=5-6. \* p < 0.05, \*\* p < 0.01, \*\*\* p < 0.001 post-hoc Holm-Sidak test vs. control. **F.** Survival assay for OPCs transfected with GFP, *FoxJ3*, or *ZFP238* expression plasmids, cultured 2 DIV in +PDGF-T3 or -PDGF-T3 media (statistics not done).

Table S1. Top candidate miRNAs induced during OL differentiation

| <b>Name</b>          | <b>log<sub>2</sub> FC</b> | <b>fold activation</b> | <b>Ave Expr</b> | <b>P Value</b> | <b>B Stat</b> |
|----------------------|---------------------------|------------------------|-----------------|----------------|---------------|
| hsa/mmu/dre-mir-219  | 4.3                       | 19.9                   | 7.5             | 5.4E-12        | 15.0          |
| dre-mir-138          | 2.9                       | 7.3                    | 6.4             | 2.9E-09        | 10.8          |
| hsa/mmu/dre-mir-338  | 3.1                       | 8.6                    | 6.4             | 1.3E-07        | 7.7           |
| hsa/mmu-miR-181c     | 1.4                       | 2.7                    | 6.9             | 1.2E-06        | 5.8           |
| dre-mir-26b          | 1.0                       | 2.0                    | 7.6             | 2.2E-06        | 5.2           |
| hsa/mmu/dre-mir-181a | 1.0                       | 2.0                    | 8.6             | 4.9E-06        | 4.3           |
| cand4right           | 0.7                       | 1.6                    | 9.7             | 8.8E-06        | 3.8           |
| hsa/mmu/dre-mir-103  | 1.1                       | 2.1                    | 8.1             | 1.2E-05        | 3.5           |
| hsa/mmu-mir-181d     | 1.2                       | 2.3                    | 7.6             | 2.3E-05        | 2.8           |

**Table S1. Top candidate miRNAs induced during OL differentiation, related to Fig.**

**4.** The nine most statistically significant differentially expressed miRNAs calculated from the microarrays are listed, based on the B statistic (B Stat.) a measure of the probability that the observed differences in expression are real. Log<sub>2</sub> FC represents the log<sub>2</sub> fold change in expression between OPCs and OLs. Avg. Expr. is the average intensity observed for each miRNA.

Table S2. Top 25 miR-219 target genes: context score

| Gene Symbol   | Gene Title                                                          | Avg context | OPC   | GC+ OL | MOG+ OL | MOG+ / OPC |
|---------------|---------------------------------------------------------------------|-------------|-------|--------|---------|------------|
| Zfp238        | zinc finger protein 238                                             | -0.930      | 2997  | 1824   | 1360    | 0.454      |
| Glt8d3        | glycosyltransferase 8 domain containing 3                           | -0.707      | 610   | 755    | 769     | 1.261      |
| Foxj3         | forkhead box J3                                                     | -0.673      | 2755  | 1384   | 781     | 0.283      |
| Cd2ap         | CD2-associated protein                                              | -0.593      | 970   | 824    | 801     | 0.826      |
| Ubr1          | ubiquitin protein ligase E3 component n-recognin 1                  | -0.547      | 1907  | 1867   | 2282    | 1.197      |
| Sorcs1        | VPS10 domain receptor protein SORCS 1                               | -0.503      | 1018  | 748    | 817     | 0.803      |
| Ash1l         | ash1 (absent, small, or homeotic)-like (Drosophila)                 | -0.500      | 1088  | 997    | 945     | 0.869      |
| Snrk          | SNF related kinase                                                  | -0.497      | 2191  | 699    | 388     | 0.177      |
| Rims1         | regulating synaptic membrane exocytosis 1                           | -0.480      | 973   | 705    | 838     | 0.861      |
| Cd164         | CD164 antigen                                                       | -0.467      | 5830  | 4152   | 4280    | 0.734      |
| Nr2c2         | nuclear receptor subfamily 2, group C, member 2                     | -0.460      | 4217  | 3074   | 2175    | 0.516      |
| Mef2d         | myocyte enhancer factor 2D                                          | -0.457      | 1032  | 978    | 638     | 0.618      |
| Elov17        | ELOVL family member 7, elongation of long chain fatty acids (yeast) | -0.447      | 358   | 8547   | 13437   | 37.527     |
| Cc2d1a        | coiled-coil and C2 domain containing 1A                             | -0.430      | 273   | 103    | 123     | 0.451      |
| Col9a1        | procollagen, type IX, alpha 1                                       | -0.427      | 392   | 1405   | 942     | 2.404      |
| Sp4           | trans-acting transcription factor 4                                 | -0.427      | 366   | 287    | 243     | 0.663      |
| Fzd4          | frizzled homolog 4 (Drosophila)                                     | -0.420      | 307   | 120    | 33      | 0.106      |
| Reck          | reversion-inducing-cysteine-rich protein with kazal motifs          | -0.417      | 893   | 622    | 401     | 0.450      |
| Mier3         | mesoderm induction early response 1, family member 3                | -0.417      | 760   | 513    | 559     | 0.735      |
| Pdgfra        | platelet derived growth factor receptor, alpha polypeptide          | -0.397      | 24131 | 13069  | 36      | 0.001      |
| Egr3          | early growth response 3                                             | -0.393      | 307   | 63     | 85      | 0.277      |
| Cugbp2        | CUG triplet repeat, RNA binding protein 2                           | -0.373      | 8527  | 2792   | 790     | 0.093      |
| D630045J12Rik | RIKEN cDNA D630045J12 gene                                          | -0.373      | 1899  | 4172   | 1368    | 0.720      |
| Dnajc6        | DnaJ (Hsp40) homolog, subfamily C, member 6                         | -0.367      | 189   | 616    | 3892    | 20.564     |
| Dazap1        | DAZ associated protein 1                                            | -0.363      | 498   | 801    | 850     | 1.707      |

**Table S2. Top 25 miR-219 target genes: context score, related to Fig. 6.** Top miR-219 predicted target genes, ranked by context score, as determined from TargetScan 5.1 (<http://www.targetscan.org/>). OPC, GC+ OL, and MOG+ OL expression levels obtained from Cahoy et al. (2008).  $MOG+ / OPC = MOG+ OL \text{ expression} / OPC \text{ expression}$ . Genes selected for further study are highlighted.

Table S3. Top 25 miR-219 target genes: OL repressed genes

| Gene Symbol   | Gene Title                                                              | Avg context | OPC   | GC+ OL | MOG+ OL | MOG+ / OPC |
|---------------|-------------------------------------------------------------------------|-------------|-------|--------|---------|------------|
| Pdgfra        | platelet derived growth factor receptor, alpha polypeptide              | -0.397      | 24131 | 13069  | 36      | 0.001      |
| Ppargc1a      | peroxisome proliferative activated receptor, gamma, coactivator 1 alpha | -0.167      | 588   | 132    | 10      | 0.016      |
| Etv5          | ets variant gene 5                                                      | -0.193      | 3087  | 509    | 66      | 0.021      |
| Ddah1         | dimethylarginine dimethylaminohydrolase 1                               | -0.293      | 7386  | 1877   | 159     | 0.021      |
| Eya1          | eyes absent 1 homolog (Drosophila)                                      | -0.220      | 2081  | 465    | 50      | 0.024      |
| 1110067D22Rik | RIKEN cDNA 1110067D22 gene                                              | -0.243      | 6490  | 1516   | 223     | 0.034      |
| Fbxo41        | F-box protein 41                                                        | -0.193      | 499   | 145    | 19      | 0.038      |
| Nol4          | nucleolar protein 4                                                     | -0.250      | 775   | 199    | 30      | 0.039      |
| Sox6          | SRY-box containing gene 6                                               | -0.243      | 4976  | 2260   | 204     | 0.041      |
| 1700022C02Rik | RIKEN cDNA 1700022C02 gene                                              | -0.153      | 344   | 56     | 16      | 0.048      |
| Lmo3          | LIM domain only 3                                                       | -0.200      | 835   | 224    | 41      | 0.049      |
| Fchsd2        | FCH and double SH3 domains 2                                            | -0.057      | 8415  | 4082   | 418     | 0.050      |
| Lpp           | LIM domain containing preferred translocation partner in lipoma         | -0.353      | 472   | 139    | 25      | 0.053      |
| AU041783      | expressed sequence AU041783                                             | -0.183      | 2518  | 1446   | 150     | 0.059      |
| Kcnh8         | potassium voltage-gated channel, subfamily H (eag-related), member 8    | -0.330      | 304   | 112    | 19      | 0.061      |
| Glce          | glucuronyl C5-epimerase                                                 | -0.140      | 1576  | 527    | 105     | 0.067      |
| Wee1          | wee 1 homolog (S. pombe)                                                | -0.173      | 508   | 118    | 36      | 0.071      |
| Rbms1         | RNA binding motif, single stranded interacting protein 1                | -0.117      | 554   | 227    | 41      | 0.074      |
| Flrt3         | fibronectin leucine rich transmembrane protein 3                        | -0.080      | 1614  | 531    | 129     | 0.080      |
| Gm96          | gene model 96, (NCBI)                                                   | -0.220      | 380   | 178    | 35      | 0.092      |
| Cugbp2        | CUG triplet repeat, RNA binding protein 2                               | -0.373      | 8527  | 2792   | 790     | 0.093      |
| Slc39a10      | solute carrier family 39 (zinc transporter), member 10                  | -0.207      | 6045  | 3171   | 563     | 0.093      |
| Tanc2         | tetratricopeptide repeat, ankyrin repeat and coiled-coil containing 2   | -0.170      | 3326  | 1142   | 331     | 0.100      |
| Robo1         | roundabout homolog 1 (Drosophila)                                       | -0.140      | 1182  | 407    | 119     | 0.101      |
| Fzd4          | frizzled homolog 4 (Drosophila)                                         | -0.420      | 307   | 120    | 33      | 0.106      |

**Table S3. Top 25 miR-219 target genes: OPC expression level, related to Fig. 6.** Top miR-219 predicted target genes, ranked by OPC expression level. Genes selected for further study are highlighted.

Table S4. Top 25 miR-219 target genes: OPC expression level

| Gene Symbol   | Gene Title                                                            | Avg context | OPC   | GC+ OL | MOG+ OL | MOG+ / OPC |
|---------------|-----------------------------------------------------------------------|-------------|-------|--------|---------|------------|
| Pdgfra        | platelet derived growth factor receptor, alpha polypeptide            | -0.397      | 24131 | 13069  | 36      | 0.001      |
| 2310047A01Rik | RIKEN cDNA 2310047A01 gene                                            | 0.007       | 11102 | 3117   | 3028    | 0.273      |
| Scarb2        | scavenger receptor class B, member 2                                  | -0.237      | 10833 | 19812  | 19956   | 1.842      |
| Spnb2         | spectrin beta 2                                                       | -0.110      | 8605  | 12072  | 14411   | 1.675      |
| Cugbp2        | CUG triplet repeat, RNA binding protein 2                             | -0.373      | 8527  | 2792   | 790     | 0.093      |
| Fchsd2        | FCH and double SH3 domains 2                                          | -0.057      | 8415  | 4082   | 418     | 0.050      |
| Ddah1         | dimethylarginine dimethylaminohydrolase 1                             | -0.293      | 7386  | 1877   | 159     | 0.021      |
| Nav1          | neuron navigator 1                                                    | -0.143      | 6511  | 6700   | 5317    | 0.817      |
| 1110067D22Rik | RIKEN cDNA 1110067D22 gene                                            | -0.243      | 6490  | 1516   | 223     | 0.034      |
| Abi2          | abl-interactor 2                                                      | -0.093      | 6345  | 5285   | 5720    | 0.901      |
| Laptm4a       | lysosomal-associated protein transmembrane 4A                         | -0.280      | 6296  | 4581   | 4116    | 0.654      |
| Slc39a10      | solute carrier family 39 (zinc transporter), member 10                | -0.207      | 6045  | 3171   | 563     | 0.093      |
| Cd164         | CD164 antigen                                                         | -0.467      | 5830  | 4152   | 4280    | 0.734      |
| Acox1         | acyl-Coenzyme A oxidase 1, palmitoyl                                  | -0.263      | 5419  | 7391   | 4379    | 0.808      |
| Dip3b         | Dip3 beta                                                             | -0.240      | 5062  | 3013   | 2063    | 0.408      |
| Sox6          | SRY-box containing gene 6                                             | -0.243      | 4976  | 2260   | 204     | 0.041      |
| Pcdh17        | protocadherin 17                                                      | -0.250      | 4655  | 3068   | 2564    | 0.551      |
| Nr2c2         | nuclear receptor subfamily 2, group C, member 2                       | -0.460      | 4217  | 3074   | 2175    | 0.516      |
| Ank           | progressive ankylosis                                                 | -0.090      | 3934  | 5379   | 10433   | 2.652      |
| Clasp1        | CLIP associating protein 1                                            | -0.220      | 3794  | 1710   | 776     | 0.205      |
| Ube3a         | ubiquitin protein ligase E3A                                          | -0.210      | 3762  | 5862   | 4630    | 1.231      |
| Smad4         | MAD homolog 4 (Drosophila)                                            | -0.240      | 3331  | 2413   | 1855    | 0.557      |
| Tanc2         | tetratricopeptide repeat, ankyrin repeat and coiled-coil containing 2 | -0.170      | 3326  | 1142   | 331     | 0.100      |
| Aff4          | AF4/FMR2 family, member 4                                             | -0.157      | 3183  | 3201   | 2971    | 0.934      |
| B230380D07Rik | RIKEN cDNA B230380D07 gene                                            | -0.160      | 3121  | 1944   | 1024    | 0.328      |

**Table S4. Top 25 miR-219 target genes: OL repressed genes, related to Fig. 6.** Top miR-219 predicted target genes, ranked by repression: MOG+ OL / OPC expression level. Genes selected for further study are highlighted.

## **Supplemental Experimental Procedures**

### **Breeding of mice**

Mice homozygous for an allele of *Dicer1* in which the exon coding for most of the second RNaseIII domain has been flanked by LoxP sites (Harfe et al., 2005) were crossed to mice heterozygous for a full-length Cre recombinase insertion into either the *Olig2* or *CNP* gene locus (Lappe-Siefke et al., 2003; Schuller et al., 2008). Mice were crossed for two generations to generate mutant *Olig2*<sup>Cre/+</sup> *Dicer1*<sup>flox/flox</sup> or *CNP*<sup>Cre/+</sup> *Dicer1*<sup>flox/flox</sup> mice and associated *Olig2* or *CNP*<sup>+/+</sup> *Dicer1*<sup>flox/flox</sup> and *Olig2* or *CNP*<sup>Cre/+</sup> *Dicer1*<sup>flox/+</sup> control genotype littermates. See supplemental experimental procedures for genotyping primers. All animal handling protocols were approved by the Stanford University Administrative Panel on Laboratory Animal Care.

### **Purification and culturing of cells**

As described previously (Dugas et al., 2006), OPCs were purified by immunopanning: following negative selection on Ran-2 and GC antibody coated immunopanning plates, OPCs were sorted from enzymatically-dissociated brains by positive selection on an O4-antibody coated immunopanning plate. For isolation of OPCs from transgenic mice, PDGFR $\alpha$ -antibody coated plates (rather than O4 plates) were used for positive selection, as described previously (Cahoy et al., 2008). Purified OPCs were cultured on poly-D-lysine (pDL) coated glass coverslips (for immunostaining) or tissue culture plastic (for all other experiments) in previously described DMEM-Sato based, serum-free medium, which contained or lacked 40 ng/ml T3 (“ $\pm$ T3”) and contained or lacked 10 ng/ml PDGF-AA + 1 ng/ml NTF3 (“ $\pm$ PDGF”) as indicated. 2% custom B-27

lacking T3 (Chen et al., 2008) was added to all mouse OPC cultures to improve health. All cultures were maintained at 37°C in 10% CO<sub>2</sub>.

### **Electron microscopy**

For EM, optic nerves were dissected, diced into 2-3mm long pieces, and processed as described in Emery et al. (2009). Ultrathin sections were generated either longitudinally (to visualize paranodal structures) or crosswise (to quantify myelinated axons). All images were collected and scored blind; >350 axons / animal were quantified.

### **Array hybridization**

Total RNA samples isolated from cultured immature OPCs and differentiating OLs were 3' end labeled with either Cy3 or Cy5 dinucleotide (CU) using T4 RNA ligase (New England Biolabs) in labeling buffer (50 mM HEPES, pH 7.8, 0.1 mM ATP, 3.5 mM DTT, 20 mM MgCl<sub>2</sub>, 10 mg/ml BSA). Labeling reactions were incubated at 4°C overnight, combined (OPC-Cy3 with OL-Cy5 or OPC-Cy5 with OL-Cy3), ethanol precipitated, and resuspended in hybridization buffer (400 mM Na<sub>2</sub>HPO<sub>4</sub> pH 7.0, 0.8% BSA, 5% SDS, 12% formamide). Samples were heated to 95°C for 3 minutes and hybridized to a microarray at 37°C for 1-2 hours. Following hybridization, microarrays were washed once with 2X SSC / 0.025% SDS, twice with 0.8X SSC, once with 0.4X SSC, and dried. To control for any potential probe specific effects, the Cy3 and Cy5 labels were swapped and an additional set of arrays were analyzed. In total, 4 arrays were hybridized with OL Cy3-RNA and OPC Cy5-RNA and 4 with OL Cy5-RNA and OPC Cy3-RNA. All microarrays were scanned using GenePix 4000b (Molecular Devices) with PMTs set to 750 (635 channel) and 650 (532 channel). Array data were fit to a linear model using limmaGUI (Wettenhall and Smyth, 2004).

## Northern Blotting

Total RNA was purified from acutely purified P23 *Olig2<sup>Cre/+</sup> Dicer1<sup>fllox/+</sup>* and *Olig2<sup>Cre/+</sup> Dicer1<sup>fllox/fllox</sup>* OLs using Qiagen miRNeasy Mini Kit. Equivalent amounts of RNA were loaded onto a 15% TBE-Urea PAGE gel, separated by electrophoresis, and transferred to Hybond N+ membrane (Amersham), following manufacturer's instructions (Bio-Rad). Blots were probed with <sup>32</sup>P end-labeled LNA probes for miR-219 and then U6 snRNA (loading control) obtained from Exiqon, following manufacturer's instructions.

## Genotyping, RT-PCR, and cloning primers

For genotyping, the following primers were used:

### *Dicer1*:

Forward - CCTGACAGTGACGGTCCAAAG

Reverse - CATGACTCTTCAACTCAAAC

wt: 351 bp; floxed allele: 420 bp

### *Cre recombinase*:

Forward - GCTAAGTGCCTTCTCTACACCTGC

Reverse - GGAAAATGCTTCTGTCCGTTTG

PCR recognizes Cre recombinase insertion

For cloning, the following primers were used to amplify the 3' UTR regions of indicated genes:

### *FoxJ3 (human)*:

Forward - CACTCAGCACTCCAGGAACA

Reverse - TCAGTTCTGGCAGCAACAAT



PDGFR $\alpha$  (mouse):

Forward - TAAAAGAGCTCAACCGTGAGTAGGTTTGGGTC

Reverse – AGTGCACTCGAGAACGTGCCTGTGGGGAATATC

Sox6 (mouse):

Forward - AAAACAACGCGTCATTTGCTCCCTTTCCCC

Reverse - AATGCTCTCGAGACAACATTCTACCTATGCAGCACAG

ZFP238 (mouse):

Forward - TTCCTGGAAGTAAAAGTTGG

Reverse - AAAAATTCACCAACACACCAA

For standard / quantitative RT-PCR, the following primers were used:

Actin (mouse/rat):

Forward - GCATTGTCACCAACTGGGACG

Reverse - ACCGCTCATTGCCGATAGTG

Dicer1 (mouse), standard RT-PCR:

Forward - ACCAGCGCTTAGAATTCCTGGGAG

Reverse - GCAGCAGACTTGGCGATCCTGTAG

Note: the 5' primer is in the exon deleted by Cre recombinase, 3' primer in the downstream exon

Dicer1 (mouse), qRT-PCR:

Forward - ACCAGCGCTTAGAATTCCTGGGAG

Reverse - GCTCAGAGTCCATTCCTTGC

Note: both primers are in the exon deleted by Cre recombinase

MBP (mouse)

Forward - TGGCAGTGCCCATTTGGTACAC

Reverse - TAGAGGGATAAGGAGGTGTCG

FoxJ3 (rat), standard RT-PCR:

Forward - CAGTGTCTTCTGCTGTTGTTGGTAAC

Reverse - AGTCATCTCATCTTGCCTGGTCC

FoxJ3 (rat), q RT-PCR:

Forward - TCAGTTCTTCACACAGACGGGC

Reverse - TATGAGGATAACCAGGGGGTGG

MBP (rat), standard RT-PCR:

Forward - CACACACAAGAAGTACCCACTACGG

Reverse - AAACAAAGGAAGCCTGGACCAC

MBP (rat), qRT-PCR:

Forward - TTCTTTAGCGGTGACAGGGGTG

Reverse - GACTACTGGGTTTTTCATCTTGGGTC

PDGFR $\alpha$  (rat), qRT-PCR:

Forward - CGTCTGGTCTTATGGCGTTCTG

Reverse - TCTCTTTTCGGGTTCACCTGTTCC

Sox6 (rat), qRT-PCR:

Forward - TGGTATGAAGATGGACGGCG

Reverse - TGTTGTTGTTGGGGAAAGGGAG

ZFP238 (rat), standard RT-PCR:

Forward - AGGTGGAGAAAGAGGCATCCTG

Reverse - TTGGAGACATAGGGAAGCAGACTG

ZFP238 (rat), qRT-PCR:

Forward - TGAAGACGAAGGCGAAGATGAC

Reverse - AGGGGCTGGCTACTGTTTTTCC

For TaqMan qRT-PCR detection of miRNA expression, the following primer pairs were ordered from Applied Biosystems:

hsa-mir-22 - 4373079

hsa-mir-26b - 4373069

hsa-mir-29a - 4373065

hsa-mir-30c - 4373060

hsa-mir-103 - 4373158

hsa-mir-138 - 4373175

hsa-mir-192 - 4373108

hsa-mir-213 - 4373086

hsa-mir-219 - 4373080

hsa-mir-338 - 4373043

hsa-mir-361 - 4373035

hsa-mir-373 - 4378073

U6 (RNU6B) - 4373381

### **miRNA reagents**

The following miRNA mimic or inhibitor reagents were ordered from Dharmacon:

rno-mir-138 mimic - C-320370-05

rno-mir-219-5p mimic - C-320418-03

rno-mir-338 mimic – C-320259-03

negative control mimic - CN-001000-01

rno-mir-138 inhibitor - C-320370-05

rno-mir-219-5p inhibitor - IH-320418-05

rno-mir-338 inhibitor - IH-320259-05

negative control inhibitor - IN-001005-01

### **Plasmids**

Immunostaining experiments. pC1-eGFP (Clontech 6084-1) was used to mark transfected cells with CMV-promoter driven eGFP production. pSPORT6-FoxJ3 was ordered from OpenBiosystems (MHS1010-99823268), in which a full-length copy of the human FoxJ3 cDNA is driven by a CMV promoter. pSPORT6-ZFP238 is the mouse full-length cDNA (OpenBiosystems MMM1013-98479034) cloned into the EcoRI (5') and NotI (3') sites in the pSPORT6 vector (FoxJ3 excised, ZFP238 inserted). ZFP238 contains an internal EcoRI site, so the larger EcoRI-NotI fragment was cloned first, then the remaining EcoRI-EcoRI site was inserted to rebuild the entire ZFP238 cDNA.

Luciferase experiments. pRL-TK (Promega E2241) expresses the Renilla luciferase gene from the constitutive HSV-TK promoter. All “test” vectors contain 3'UTRs of candidate genes cloned into pGL3-target, a modified pGL3 vector containing a multiple cloning site downstream of the firefly luciferase gene, which is driven by an SV40 promoter. Primers listed above were used to PCR amplify (using Platinum Taq HiFi, Invitrogen) and clone the following 3'UTRs:

- *FoxJ3*: Amplify 1884-5146 from pSPORT6-FoxJ3 cDNA insert (NCBI BC151828), adding MluI and XhoI sites 5' and 3', respectively, for cloning into pGL3-target.
- *PDGFR $\alpha$* : Amplify 4036-6326 from the full-length mouse PDGFR $\alpha$  cDNA NM\_011058 (this region contained in OpenBiosystems EMM3836-9478919 EST clone NCBI BG078820, insert is full PDGFR $\alpha$  3'UTR) adding SacI and XhoI sites 5' and 3', respectively, for cloning into pGL3-target.
- *Sox6*: Amplify 2692-4915 from the full-length mouse Sox6 cDNA (NCBI BC067407; OpenBiosystems MMM1013-98478819), adding MluI and XhoI sites 5' and 3', respectively, for cloning into pGL3-target.
- *ZFP238*: Amplify 1953-3905 from full-length mouse ZFP238 cDNA insert (NCBI BC054742), adding MluI and XhoI sites 5' and 3', respectively, for cloning into pGL3-target.

### Site-directed mutagenesis

Site-directed mutagenesis was performed with the Stratagene QuikChangeII Site Directed Mutagenesis kit according to manufacturer's instructions, using the following primers:

FoxJ3-

5' primer

CCAATGTTATCAAATTACTTTTGAAGCCGCGGAGAAGGATTTTAGCTGGAT  
AACTTACTGG

2134-2195 from FoxJ3 (human) 3'UTR

2160-2167 219 site changed: GACAATCA to GcCgaggA (change to SacII site)

3' primer

CCAGTAAGTTATCCAGCTAAAATCCTTCTCCGCGGCTTCAAAGTAATTTTGA

TAACATTGG (reverse complement of 5' primer)

PDGFRa-

5' primer

CTTTCCTGCTTTCTATTTTTATGATGCCGCGGAAAGCTTGCCCGAGGAACACA

ATTTGTG

6037-6096 from PDGFRa 3' UTR

6062-6069 miR-219 site changed: GACAAUCA to GcCgcggA (SacII site inserted)

3' primer

CACAAATTGTGTTCCCTCGGGCAAGCTTCCGCGGCATCATAAAAATAGAAAG

CAGGAAAG (reverse complement of 5' primer)

Sox6-

5' primer

GTCTTACAGGAGACACTGCAAAGTCTTAGCCGCGGTTTGACATCTTAAAATA

AAACAGC

3256-3314 from Sox6 (mouse) 3'UTR

3284-3290 miR-219 site changed: GACAATC to GcCgcgg (SacII site added)

3' primer

GCTGTTTTATTTAAGATGTCAAACCGCGGCTAAGACTTTGCAGTGTCTCCTG

TAAGAC (reverse complement of 5' primer)

ZFP238-

5' primer #1 (SacII)

GTAAAATAATCTTTATTAATCTAGAGGAGCCGCGGAATGTCTGTGGAAGAA  
CGGACTTTTTTGG

3659-3723 from ZFP238 (mouse) 3'UTR

3688-3695 miR-219 site changed: GACAAUCA to GcCgcggA (SacII site inserted)

3' primer #1 (SacII)

CCAAAAAAGTCCGTTCTTCCACAGACATTCCGCGGCTCCTCTAGATTAATAAA  
GATTATTTAAC (reverse complement of 5' primer)

5' primer #2 (PvuII)

GTTCTAAATCTTAGACTGACATCTAGCTTTGCAGCTGATAGTATGTTTTATTTC  
CTGAGGGGG

3791-3853 from ZFP238 (mouse) 3'UTR

3821-3828 miR-219 site changed: GACAATCA to GcagcTgA (insert PvuII site)

3' primer #2 (PvuII)

CCCCCTCAGGAAATAAAACATACTATCAGCTGCAAAGCTAGATGTCAGTCTA  
AGATTTAGAAC (reverse complement of 5' primer)

### **Luciferase assays and 293 cell transfections**

HEK-293 cells were cultured in DMEM + 10% fetal calf serum (Invitrogen) and grown to 90-95% confluence, then transfected with Lipofectamine 2000 (Invitrogen) following manufacturer's instructions. For luciferase assays, 1 µg test firefly luciferase plasmid, 0.15 µg pRL-TK Renilla luciferase control plasmid (Promega), and 25 pmol

miRNA mimic reagent were combined in transfections. Cells were then cultured 24-48 hours at 37°C, 5% CO<sub>2</sub>.

Luciferase activity was assayed using Dual-Luciferase Reporter Assay System (Promega). In all experiments, firefly (test) luciferase activity was normalized relative to the level of Renilla (transfection control) luciferase activity in the same well. Within a single experiment (comparing miR-219 mimic to control reagent), all individual firefly/Renilla ratios were then normalized to the average of the control mimic - test firefly - control Renilla transfection well ratios.

### **Cell survival assays**

Cell survival in *FoxJ3* and *ZFP238* transfections was determined after 2 DIV in proliferative (+PDGF-T3) or differentiation (-PDGF-T3) media, using the Invitrogen LIVE/DEAD Viability/Cytotoxicity Kit for mammalian cells, following manufacturer's instructions.
